# Supplementary material for: Evaluation of Effective Class-Balancing Techniques for CNN-Based Assessment of Aphanomyces Root Rot Resistance in Pea (Pisum sativum L.)
Source: MDPI journal article supplement (doi:10.3390/s22197237), 2022-09-24
Supplement: s1 [file s1]

### Supplementary Materials

**Table S1.** Summary of GAN-generator model (layer-wise).

| Layer Name             | Parameter                                 | Activations                |
|------------------------|-------------------------------------------|----------------------------|
| Vector input           |                                           | $1 \times 1 \times 100$    |
| Fully connected        |                                           | $24 \times 24 \times 512$  |
| Transposed convolution | $5 \times 5$ filters; $2 \times 2$ stride | $28 \times 28 \times 256$  |
| Batch normalization    | 256 channels                              | $28 \times 28 \times 256$  |
| ReLU                   | ReLU activation function                  | $28 \times 28 \times 256$  |
| Transposed convolution | $5 \times 5$ filters; $2 \times 2$ stride | $56 \times 56 \times 128$  |
| Batch normalization    | 128 channels                              | $56 \times 56 \times 128$  |
| ReLU                   | ReLU activation function                  | $56 \times 56 \times 128$  |
| Transposed convolution | $5 \times 5$ filters; $2 \times 2$ stride | $112 \times 112 \times 64$ |
| Batch normalization    | 64 channels                               | $112 \times 112 \times 64$ |
| ReLU                   | ReLU activation function                  | $112 \times 112 \times 64$ |
| Transposed convolution | $5 \times 5$ filters; $2 \times 2$ stride | $224 \times 224 \times 3$  |
| tanh                   | tanh activation function                  | $224 \times 224 \times 3$  |

**Table S2.** Summary of GAN-discriminator model (layer-wise).

| Layer Name          | Parameter                                 | Activations                |
|---------------------|-------------------------------------------|----------------------------|
| Image input         |                                           | $224 \times 224 \times 3$  |
| Dropout             | 50% dropout                               | $224 \times 224 \times 3$  |
| Convolution         | $5 \times 5$ filters; $2 \times 2$ stride | $112 \times 112 \times 64$ |
| Leaky ReLU          | 0.20 scale                                | $112 \times 112 \times 64$ |
| Convolution         | $5 \times 5$ filters; $2 \times 2$ stride | $56 \times 56 \times 128$  |
| Batch normalization | 128 channels                              | $56 \times 56 \times 128$  |
| Leaky ReLU          | 0.20 scale                                | $56 \times 56 \times 128$  |
| Convolution         | $5 \times 5$ filters; $2 \times 2$ stride | $28 \times 28 \times 256$  |
| Batch normalization | 256 channels                              | $28 \times 28 \times 256$  |
| Leaky ReLU          | 0.20 scale                                | $28 \times 28 \times 256$  |
| Convolution         | $5 \times 5$ filters; $2 \times 2$ stride | $14 \times 14 \times 512$  |
| Batch normalization | 512 channels                              | $14 \times 14 \times 512$  |
| Leaky ReLU          | 0.20 scale                                | $14 \times 14 \times 512$  |
| Convolution         | $5 \times 5$ filters; $2 \times 2$ stride | $7 \times 7 \times 1024$   |
| Batch normalization | 1024 channels                             | $7 \times 7 \times 1024$   |
| Leaky ReLU          | 0.20 scale                                | $7 \times 7 \times 1024$   |
| Convolution         | $5 \times 5$ filters; $2 \times 2$ stride | $4 \times 4 \times 1024$   |
| Batch normalization | 2048 channels                             | $4 \times 4 \times 1024$   |
| Leaky ReLU          | 0.20 scale                                | $4 \times 4 \times 1024$   |
| Convolution         | $4 \times 4$ filters; $1 \times 1$ stride | $1 \times 1 \times 1$      |

**Table S3.** Performance (Mean  $\pm$  SD) during training with the original pea root images using DeepARRNet model.

| Class        | Precision                         | Recall                            | F1-score                          |
|--------------|-----------------------------------|-----------------------------------|-----------------------------------|
| Resistant    | 0.98 $\pm$ 0.03                   | 0.94 $\pm$ 0.04                   | 0.96 $\pm$ 0.04                   |
| Intermediate | 0.85 $\pm$ 0.05                   | 0.98 $\pm$ 0.02                   | 0.92 $\pm$ 0.04                   |
| Susceptible  | 0.98 $\pm$ 0.07                   | 0.32 $\pm$ 0.08                   | 0.67 $\pm$ 0.07                   |
| Overall      | <b>0.93 <math>\pm</math> 0.05</b> | <b>0.78 <math>\pm</math> 0.04</b> | <b>0.85 <math>\pm</math> 0.04</b> |

**Table S4.** Performance (Mean  $\pm$  SD) during training with the original pea root images and random oversampling augmented data using DeepARRNet model.

| Class        | Precision                         | Recall                            | F1-score                          |
|--------------|-----------------------------------|-----------------------------------|-----------------------------------|
| Resistant    | 0.98 $\pm$ 0.04                   | 0.94 $\pm$ 0.04                   | 0.96 $\pm$ 0.04                   |
| Intermediate | 0.89 $\pm$ 0.03                   | 0.97 $\pm$ 0.05                   | 0.93 $\pm$ 0.04                   |
| Susceptible  | 0.92 $\pm$ 0.07                   | 0.74 $\pm$ 0.06                   | 0.81 $\pm$ 0.06                   |
| Overall      | <b>0.95 <math>\pm</math> 0.05</b> | <b>0.88 <math>\pm</math> 0.05</b> | <b>0.91 <math>\pm</math> 0.05</b> |

**Table S5.** Performance (Mean  $\pm$  SD) during training with the original pea root and GAN-augmented data using DeepARRNet model.

| Class        | Precision                         | Recall                            | F1-score                          |
|--------------|-----------------------------------|-----------------------------------|-----------------------------------|
| Resistant    | 0.98 $\pm$ 0.03                   | 0.93 $\pm$ 0.03                   | 0.96 $\pm$ 0.03                   |
| Intermediate | 0.91 $\pm$ 0.05                   | 0.97 $\pm$ 0.07                   | 0.94 $\pm$ 0.07                   |
| Susceptible  | 0.92 $\pm$ 0.07                   | 0.79 $\pm$ 0.07                   | 0.85 $\pm$ 0.07                   |
| Overall      | <b>0.97 <math>\pm</math> 0.05</b> | <b>0.89 <math>\pm</math> 0.06</b> | <b>0.93 <math>\pm</math> 0.06</b> |

**Table S6.** Performance (Mean  $\pm$  SD) during training with the original pea root applying class weighing methods, INS and ISRNS, using DeepARRNet model.

| Weight ratio | Class        | Precision                         | Recall                            | F1-score                          |
|--------------|--------------|-----------------------------------|-----------------------------------|-----------------------------------|
| INS          | Resistant    | 0.98 $\pm$ 0.04                   | 0.93 $\pm$ 0.05                   | 0.96 $\pm$ 0.05                   |
|              | Intermediate | 0.90 $\pm$ 0.07                   | 0.97 $\pm$ 0.08                   | 0.93 $\pm$ 0.07                   |
|              | Susceptible  | 0.91 $\pm$ 0.08                   | 0.69 $\pm$ 0.08                   | 0.70 $\pm$ 0.08                   |
|              | Overall      | <b>0.94 <math>\pm</math> 0.07</b> | <b>0.90 <math>\pm</math> 0.06</b> | <b>0.92 <math>\pm</math> 0.07</b> |
| ISRNS        | Resistant    | 0.98 $\pm$ 0.04                   | 0.92 $\pm$ 0.07                   | 0.95 $\pm$ 0.06                   |
|              | Intermediate | 0.88 $\pm$ 0.07                   | 0.94 $\pm$ 0.08                   | 0.92 $\pm$ 0.08                   |
|              | Susceptible  | 0.90 $\pm$ 0.07                   | 0.70 $\pm$ 0.08                   | 0.80 $\pm$ 0.08                   |
|              | Overall      | <b>0.93 <math>\pm</math> 0.05</b> | <b>0.86 <math>\pm</math> 0.08</b> | <b>0.90 <math>\pm</math> 0.07</b> |
